# Supplementary material for: Identification and Characterization of a Garlic Virus E Genome in Garlic (Allium sativum L.) Using High-Throughput Sequencing from India
Source: MDPI journal article supplement (doi:10.3390/plants11020224), 2022-01-15
Supplement: s1 [file s1]

**Table S1.** HTS statistics for each sample before and after quality control showing the number of reads and the range of read lengths in base pairs (bp).

| Sample | Input Reads | Average length | No. of Read after Trim-<br>ming | Percentage Trimmed<br>(%) | Average Length after<br>Trim |
|--------|-------------|----------------|---------------------------------|---------------------------|------------------------------|
| Clove  | 34,873,376  | 125.0          | 34,873,264                      | 100.0                     | 124.54                       |
| Leaf   | 31,497,56   | 124.99         | 31,494,032                      | 99.99                     | 124.57                       |

**Table S2.** Number of viral reads mapped to a reference sequence.

| Sample | Total reads | GarV-E             | GarV-A               | GarV-D             | GarV-X             | LYSV               | OYDV              | GarCLV               |
|--------|-------------|--------------------|----------------------|--------------------|--------------------|--------------------|-------------------|----------------------|
| Clove  | 34,873,152  | 100,184<br>(0.33%) | 144,529<br>(0.41%)   | 239,254<br>(0.69%) | 97,926<br>(0.28%)  | 510,948<br>(1.95%) | 4,817<br>(0.01%)  | 144,529<br>(0.41%)   |
| Leaf   | 31,49,974   | 510,948<br>(1.95%) | 1,004,995<br>(3.19%) | 100,184<br>(0.33%) | 265,986<br>(0.84%) | 25,009<br>(0.08%)  | 21,121<br>(0.07%) | 1,004,995<br>(3.19%) |

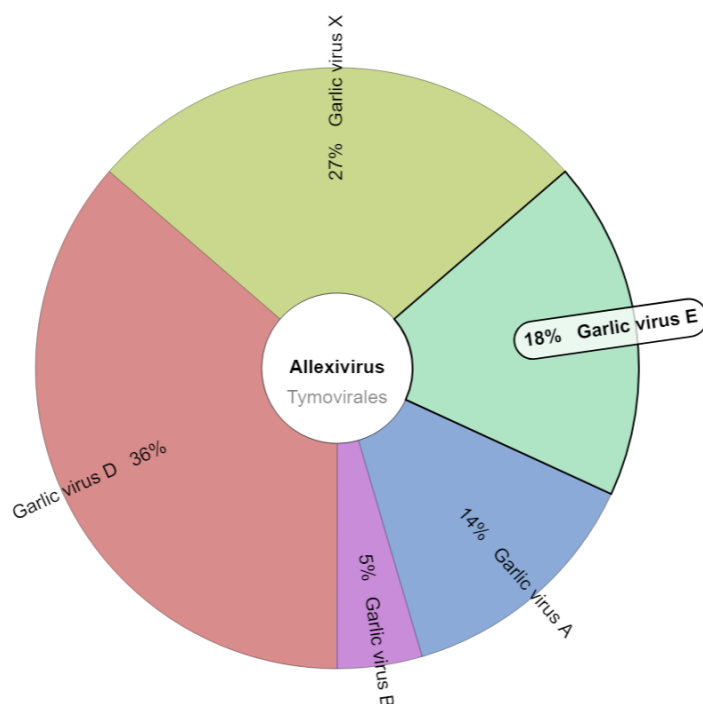

**Figure S1.** Krona plot of Allelexivirus genome sequence reads generated on Illumina sequencing platforms.

**Table S3.** Comparisons of nucleotide sequence (nts) and amino acid (aa) identity of pairwise combinations of partial CP/NABP sequences of garlic virus E (accession no. MW925695) with other isolates of garlic viruses infecting garlic reported worldwide.

| Seq-> nts/aa          | MW925695_GarV-E_India | LC097189_GarV-E_Japan | LC097188_GarV-E_Japan | LC097187_GarV-E_China | LC097186_GarV-E_USA | LC097185_GarV-E_USA | LC097184_GarV-E_USA | AJ551502_GarV-E_China | AJ551501_GarV-E_China | AJ551500_GarV-E_China | AJ551499_GarV-E_China | AJ551498_GarV-E_China |
|-----------------------|-----------------------|-----------------------|-----------------------|-----------------------|---------------------|---------------------|---------------------|-----------------------|-----------------------|-----------------------|-----------------------|-----------------------|
| MW925695_GarV-E_India | ID                    | 96.7                  | 96.3                  | 96.3                  | 95.9                | 96.3                | 96.3                | 84.5                  | 84.9                  | 84.1                  | 85.3                  | 82.5                  |
| LC097189_GarV-E_Japan | 92.9                  | ID                    | 99.5                  | 99.5                  | 99.1                | 99.5                | 99.5                | 86.9                  | 87.3                  | 86.5                  | 87.8                  | 84.1                  |
| LC097188_GarV-E_Japan | 92.5                  | 99.5                  | ID                    | 100                   | 99.5                | 100                 | 100                 | 86.9                  | 87.3                  | 86.5                  | 87.3                  | 83.7                  |
| LC097187_GarV-E_China | 92.5                  | 99.5                  | 99.8                  | ID                    | 99.5                | 100                 | 100                 | 86.9                  | 87.3                  | 86.5                  | 87.3                  | 83.7                  |
| LC097186_GarV-E_USA   | 92.3                  | 99.4                  | 99.8                  | 99.7                  | ID                  | 99.5                | 99.5                | 86.9                  | 87.3                  | 86.5                  | 87.3                  | 83.3                  |
| LC097185_GarV-E_USA   | 92.6                  | 99.7                  | 99.8                  | 99.8                  | 99.7                | ID                  | 100                 | 86.9                  | 87.3                  | 86.5                  | 87.3                  | 83.7                  |
| LC097184_GarV-E_USA   | 92.6                  | 99.7                  | 99.8                  | 99.8                  | 99.7                | 100                 | ID                  | 86.9                  | 87.3                  | 86.5                  | 87.3                  | 83.7                  |
| AJ551502_GarV-E_China | 86.1                  | 89.6                  | 89.4                  | 89.4                  | 89.3                | 89.6                | 89.6                | ID                    | 99.5                  | 99.1                  | 85.2                  | 83.9                  |
| AJ551501_GarV-E_China | 86.3                  | 89.7                  | 89.8                  | 89.7                  | 89.7                | 89.7                | 89.7                | 98.2                  | ID                    | 98.7                  | 85.6                  | 84.3                  |
| AJ551500_GarV-E_China | 86.1                  | 89.4                  | 89.6                  | 89.6                  | 89.4                | 89.7                | 89.7                | 98.6                  | 98.2                  | ID                    | 84.8                  | 83.5                  |
| AJ551499_GarV-E_China | 85.2                  | 88.9                  | 88.8                  | 88.8                  | 88.6                | 88.9                | 88.9                | 88.0                  | 88.5                  | 88.0                  | ID                    | 88.0                  |
| AJ551498_GarV-E_China | 83.5                  | 86.6                  | 86.4                  | 86.4                  | 86.3                | 86.6                | 86.6                | 86.6                  | 86.8                  | 86.4                  | 88.4                  | ID                    |

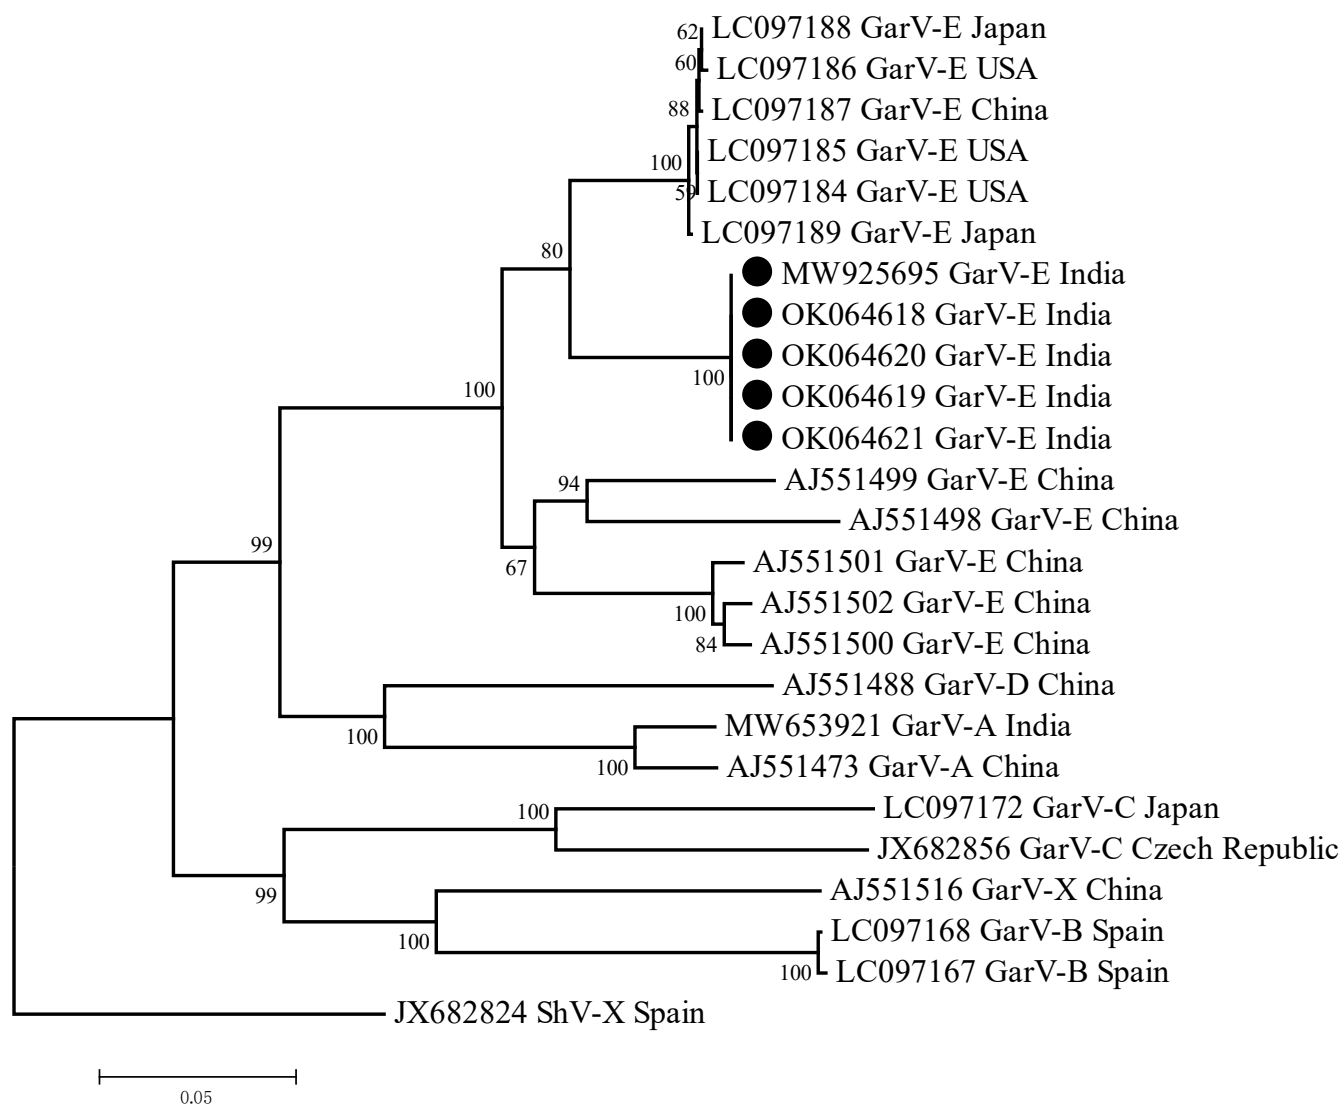

**Figure S2.** Phylogenetic analysis of GarV-E isolates in the partial CP/NABP genome sequence using Neighbour joining algorithm. The evolutionary distances were computed using p-distance method with 1000 bootstrap replicates. The scale bar indicates the number of substitutions per site.
